# Supplementary material for: Single cell molecular alterations reveal target cells and pathways of concussive brain injury
Source: PubMed Central journal article supplement (PMC6156584; doi:10.1038/s41467-018-06222-0), 2018-09-25
Supplement: 41467_2018_6222_MOESM3_ESM.pdf [file 41467_2018_6222_MOESM3_ESM.pdf]

## **Description of Additional Supplementary Files**

**File Name: Supplementary Data 1**

**Description:** Marker genes for major hippocampal cell clusters.

**File Name: Supplementary Data 2**

**Description:** Significant correlations between peptides from source cells and genes in target cells in the cell-cell gene coexpression analysis in Sham and TBI groups.

**File Name: Supplementary Data 3**

**Description:** Differentially expressed genes induced by TBI in individual cell clusters.

**File Name: Supplementary Data 4**

**Description:** Over-represented biological pathways among DEGs between Sham and TBI for individual cell clusters.

**File Name: Supplementary Data 5**

**Description:** Over-represented biological pathways among T4 treatment DEGs (T4 treated TBI vs TBI), TBI DEGs (TBI vs Sham), and TBI DEGs reversed by T4 treatment.
